# Supplementary material for: PSPC1 Inhibition Synergizes with Poly(ADP-ribose) Polymerase Inhibitors in a Preclinical Model of BRCA-Mutated Breast/Ovarian Cancer
Source: MDPI journal article supplement (doi:10.3390/ijms242317086), 2023-12-03
Supplement: s1 [file s1]

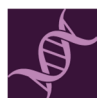

Article

# PSPC1 Inhibition Synergizes with Poly (ADP-ribose) Polymerase Inhibitors in a Preclinical Model of BRCA-mutated Breast/Ovarian Cancer

Mithun Ghosh <sup>1</sup>, Min Sil Kang<sup>1</sup>, Nar Bahadur Katuwal<sup>1</sup>, Sa Deok Hong<sup>1</sup>, Yeong Gyu Jeong<sup>1</sup>, Seong Min Park<sup>1</sup>, Seul-Gi Kim<sup>2</sup>, Yong Wha Moon<sup>2,\*</sup>

<sup>1</sup> Department of Biomedical Science, The Graduate School, CHA University, Seongnam-si, Republic of Korea (13488); mithunghoshmg@gmail.com (M.G.); rkda1stlf1097@gmail.com (M.S.K.); narbahadurkatwal@gmail.com (N.B.K.); duggy126@gmail.com (S.D.H.); younggyu6337@gmail.com (Y.G.J.); hoy105@naver.com (S.M.P.)

<sup>2</sup> Hematology and Oncology, Department of Internal Medicine, CHA Bundang Medical Center, CHA University, Seongnam-si, Republic of Korea (13496); sophia311@chamc.co.kr (S.G.K.)

\* Correspondence: [ymoon@cha.ac.kr](mailto:ymoon@cha.ac.kr) (Y.W.M.); Tel: +82-31-780-3436 (Y.W.M), Fax: +82-31-780-3929 (Y.W.M)

**Citation:** To be added by editorial staff during production.

Academic Editor: Firstname Last-name

Received: date

Revised: date

Accepted: date

Published: date

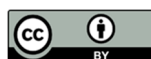

**Copyright:** © 2023 by the authors.

Submitted for possible open access publication under the terms and conditions of the Creative Commons Attribution (CC BY) license (<https://creativecommons.org/licenses/by/4.0/>).

Supplementary figure

18

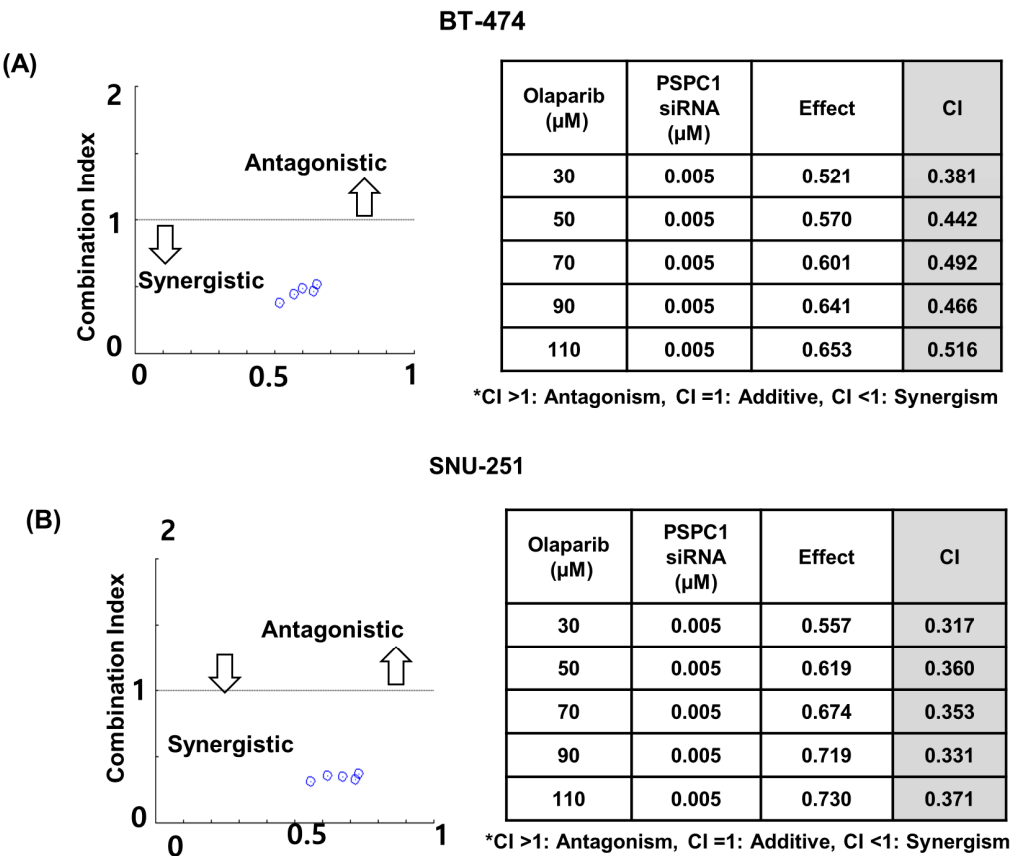

Supplementary figure S1. (A) CI value of MTT assay in BT-474 cells. (B) CI value of MTT assay in SNU-251 cells

19

20

21

22

23

24

25

26

27

28

29

30

31

32

33

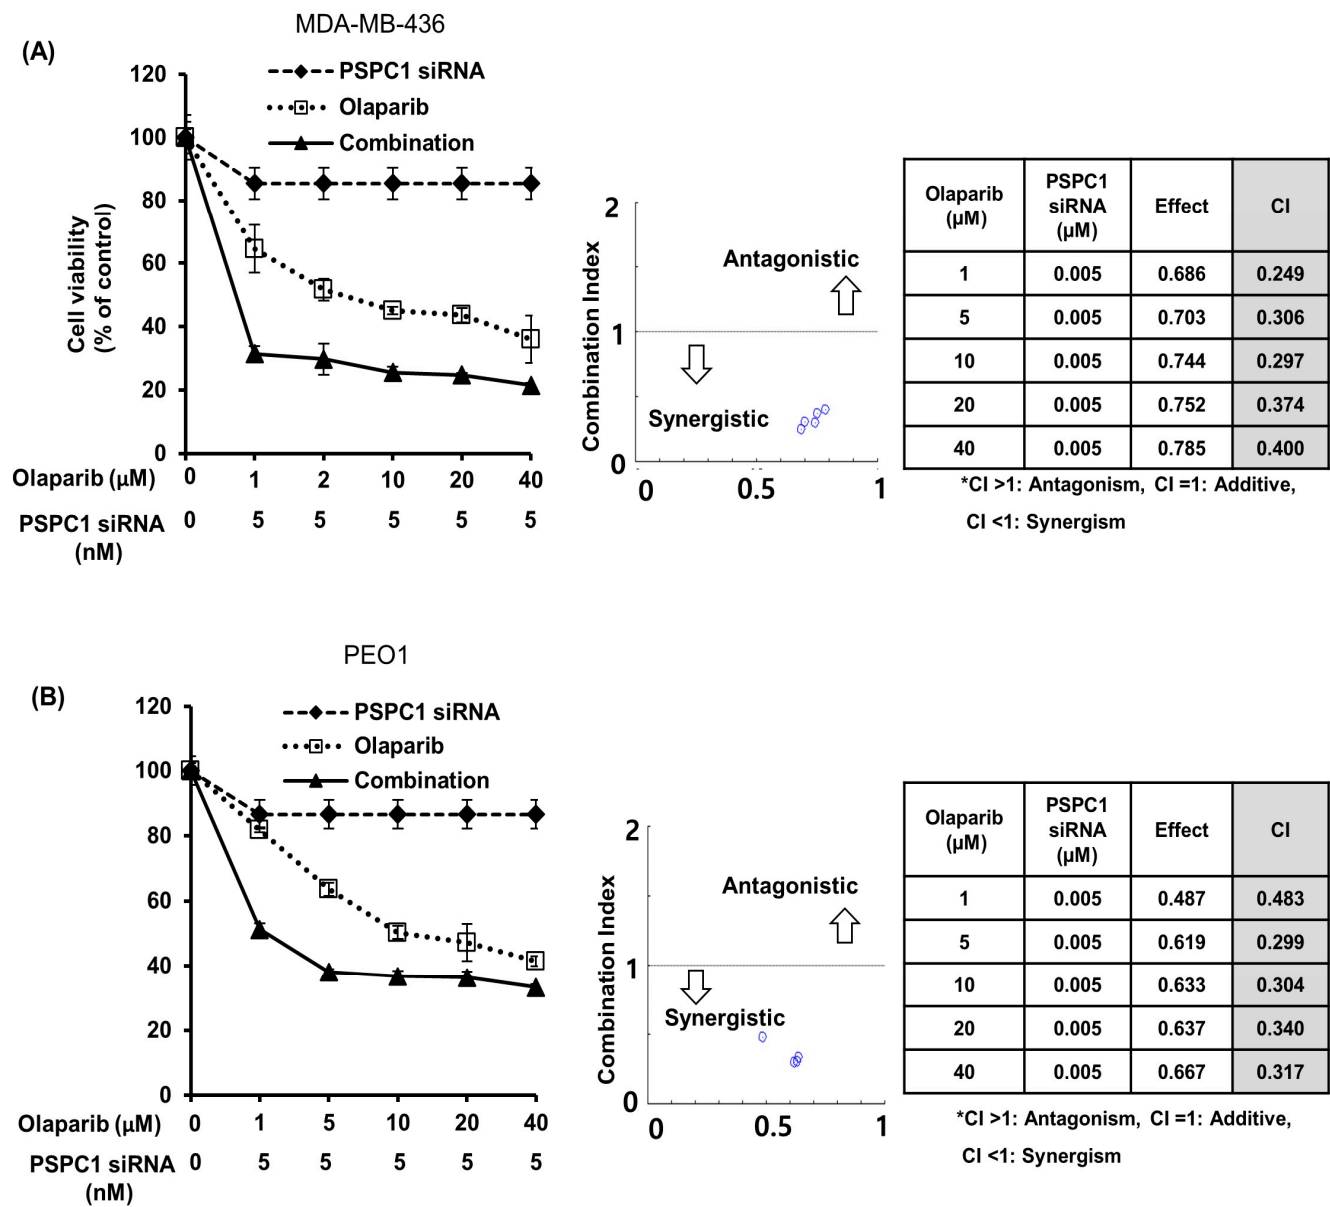

**Supplementary figure S2.** (A-B) MTT assay showed that combined PSpC1 siRNA and olaparib enhanced the antiproliferative effects in (A) MDA-MB-436 and (B) PEO1 cells. Cells were treated with 5 nM of PSpC1 siRNA and indicated concentrations of olaparib and incubated for 72 hours. Middle and right panel exhibited combination index (CI) and CI values respectively.

Supplementary Tables

Supplementary table S1: Information about histology, subtype, and BRCA1/2 mutation of BT-474 and SNU-251 cell.

| Cell          | BT-474                          | MDA-MB-436                | SNU-251                                             | PEO1                     |
|---------------|---------------------------------|---------------------------|-----------------------------------------------------|--------------------------|
| Cancer type   | Breast                          | Breast                    | Ovarian                                             | Ovarian                  |
| Histology     | IDC (Invasive ductal carcinoma) | Invasive breast carcinoma | Endometroid carcinoma                               | Cystadenocarcinoma       |
| Subtype       | ER+HER2+                        | Triple negative           |                                                     |                          |
| BRCA mutation | BRCA2-mutated                   | BRCA1-mutated             | BRCA1-mutated                                       | BRCA2-mutated            |
|               | 9281C > A; (S3094*)             | c.5277 + 1G>A             | Codon 1815 non-sense mutation, TGG(Trp) →TGA (stop) | p.Tyr1655Ter (c.4965C>G) |
|               | Pathogenic                      | Pathogenic                | Pathogenic                                          | Pathogenic               |

**Supplementary table S2:** List of Primary and secondary antibodies were used in western blot and immunocytochemistry.

| Antibody        | Host species | Dilution | Company (catalog#)     | Application |
|-----------------|--------------|----------|------------------------|-------------|
| PSPC1           | Mouse        | 1:100    | sc-374181, Santa Cruz  | WB          |
| Caspase-3       | Rabbit       | 1:1000   | 9662, Cell signaling   | WB          |
| DNA-PKcs        | Rabbit       | 1:1000   | ab32566, Abcam         | WB          |
| ATM             | Mouse        | 1:200    | sc-23921, Santa Cruz   | WB          |
| p-ATM           | Mouse        | 1:200    | sc-47739, Santa Cruz   | WB          |
| γH2AX           | Rabbit       | 1:1000   | 5437, Cell signaling   | WB, ICC     |
| p-cdc25C        | Rabbit       | 1:1000   | 4901, Cell signaling   | WB          |
| p-cdc2          | Rabbit       | 1:1000   | 4539, Cell signaling   | WB          |
| GAPDH           | Rabbit       | 1:1000   | 2118, Cell signaling   | WB          |
| Anti-Rabbit HRP | Goat         | 1:5000   | GTX213110-01, Gene Tex | WB          |
| Anti-Mouse HRP  | Goat         | 1:5000   | GTX213111-01, Gene Tex | WB          |

**Supplementary table S3:** A list of 19 BRCA1/2-mutated ovarian cancer cell lines in the GDSC database and olaparib IC<sub>50</sub>. BRCA1/2 mutation was determined from COSMIC website (<https://cancer.sanger.ac.uk>)

| Cell line | Cosmic ID | Cancer type | BRCA1/2 mutation | Olaparib IC <sub>50</sub> (nmol) |
|-----------|-----------|-------------|------------------|----------------------------------|
| SK-OV-3   | 905959    | Ovary       | BRCA2            | 4750.87                          |
| IGROV-1   | 905968    | Ovary       | BRCA1            | 4841.77                          |
| OVCAR-4   | 905990    | Ovary       | BRCA2            | 4265.86                          |
| EFO-27    | 906852    | Ovary       | BRCA2            | 3511.01                          |
| OC-314    | 909257    | Ovary       | BRCA1/2          | 3676.41                          |
| SW626     | 909753    | Ovary       | BRCA2            | 4543.61                          |
| KURAMOCH  | 909975    | Ovary       | BRCA2            | 4623.21                          |
| OAW-42    | 910548    | Ovary       | BRCA2            | 3413.52                          |
| KGN       | 924186    | Ovary       | BRCA1            | 4553.62                          |
| OVMIU     | 1240200   | Ovary       | BRCA2            | 4663.57                          |
| TOV-21G   | 1240222   | Ovary       | BRCA2            | 846.66                           |
| RKN       | 1298539   | Ovary       | BRCA2            | 3681.74                          |
| JHOS-2    | 1479995   | Ovary       | BRCA1            | 4094.88                          |
| JHOS-3    | 1480358   | Ovary       | BRCA1            | 4997.17                          |
| JHOS-4    | 1480359   | Ovary       | BRCA1            | 5189.69                          |
| OV-17R    | 1480361   | Ovary       | BRCA2            | 4904.96                          |
| OVCA420   | 1480364   | Ovary       | BRCA1            | 5025.65                          |
| PEO1      | 1480372   | Ovary       | BRCA2            | 4243.23                          |
| UWB1.289  | 1480374   | Ovary       | BRCA1            | 4009.04                          |

84  
85  
86  
87

88
