# Supplementary figures and images for: PSPC1 Inhibition Synergizes with Poly(ADP-ribose) Polymerase Inhibitors in a Preclinical Model of BRCA-Mutated Breast/Ovarian Cancer
Source: MDPI journal article supplement (doi:10.3390/ijms242317086), 2023-12-03

Figure 1

(F)

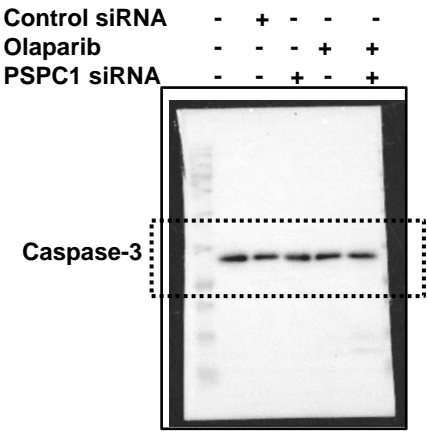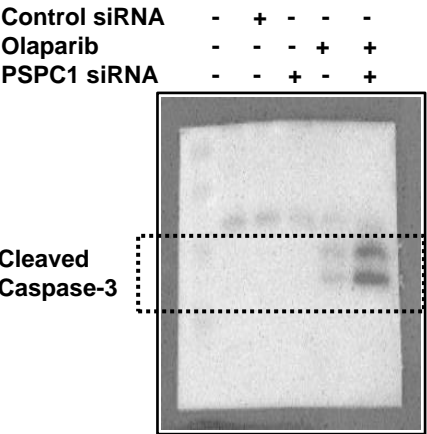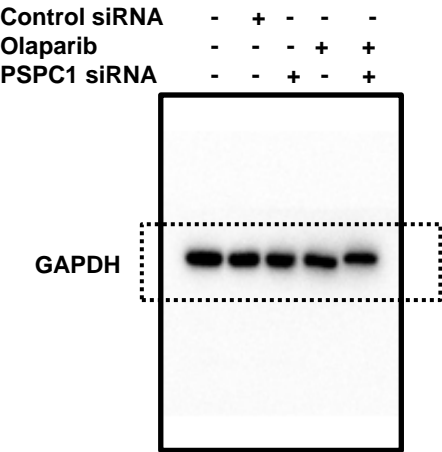

(G)

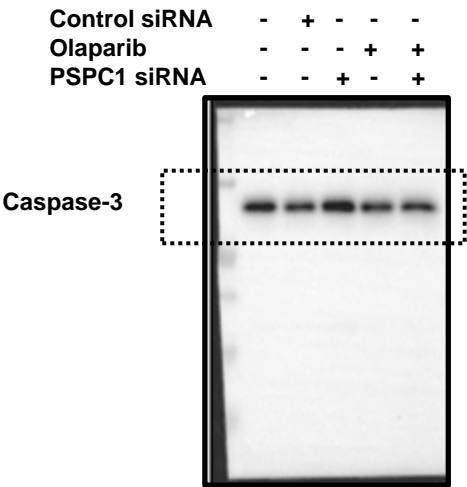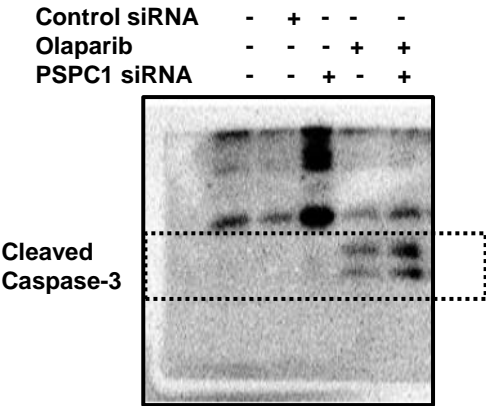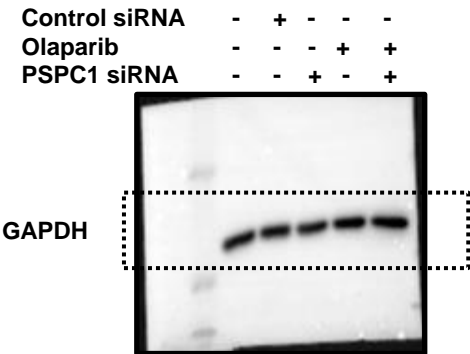

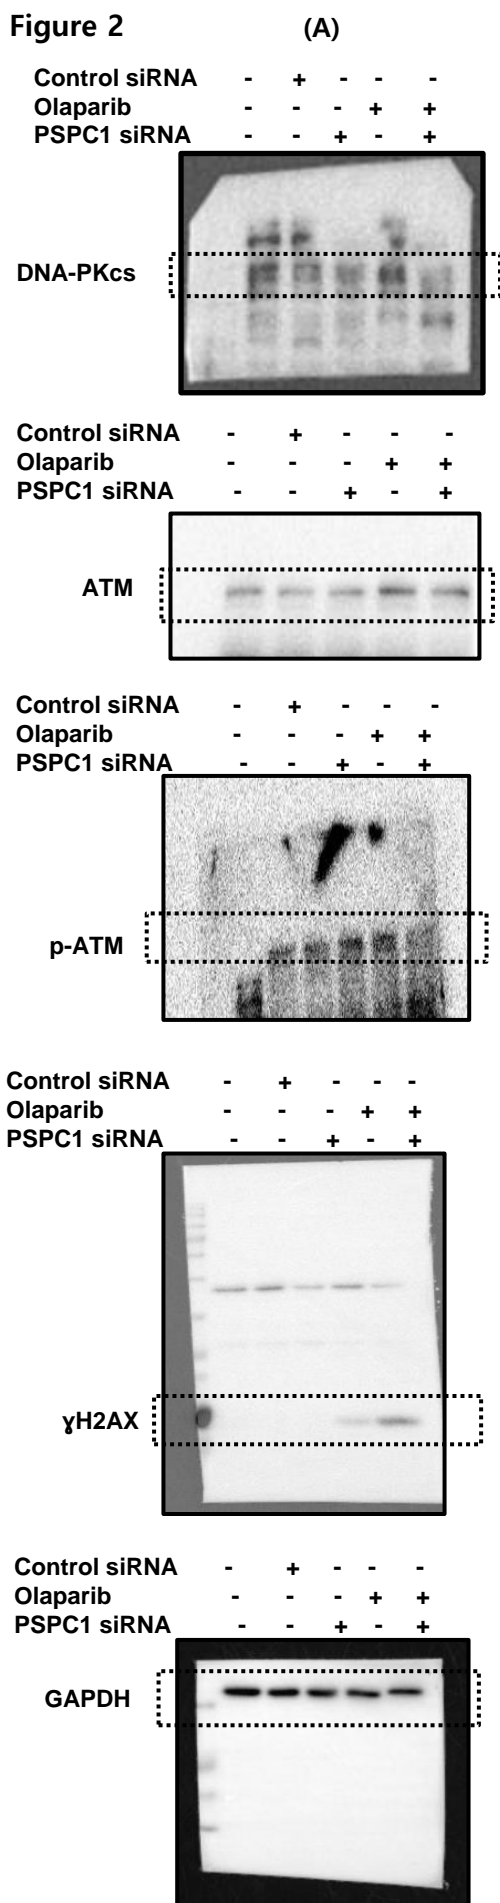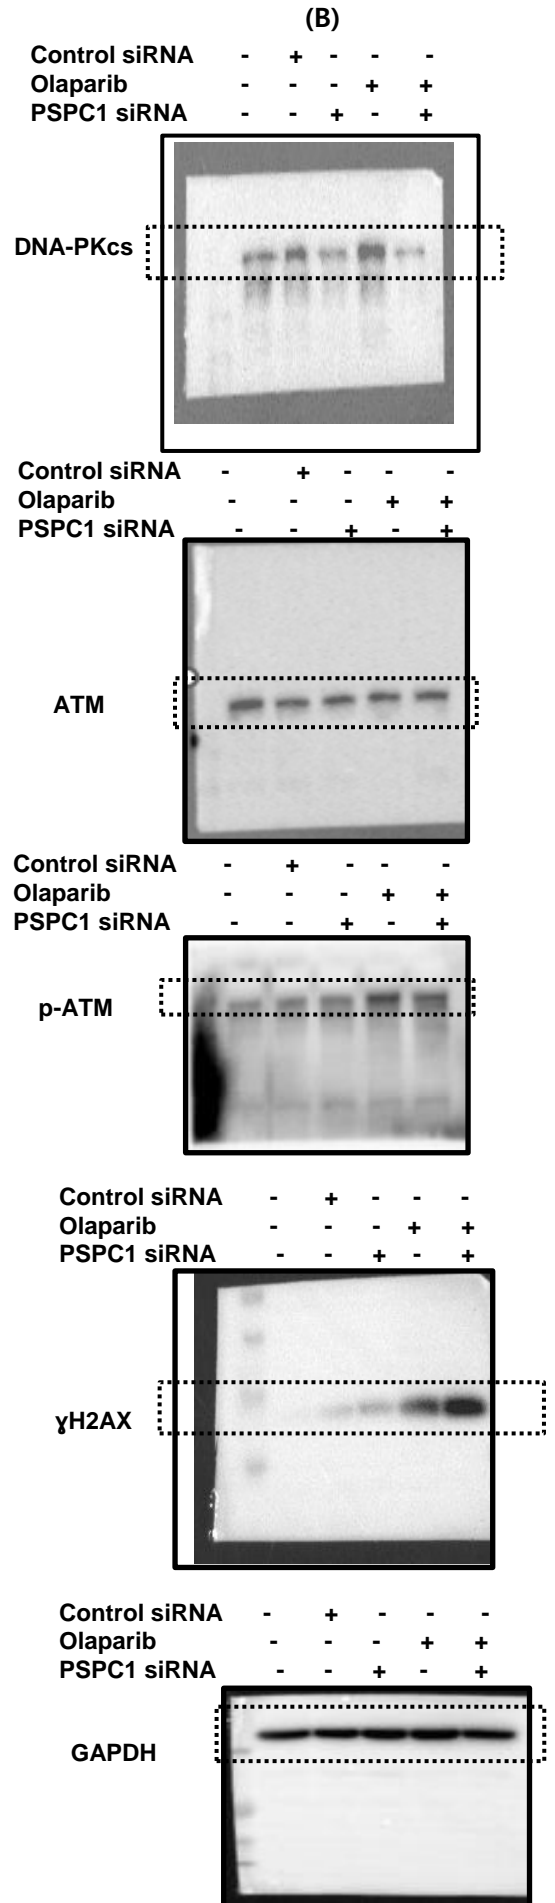

Figure 3

(C)

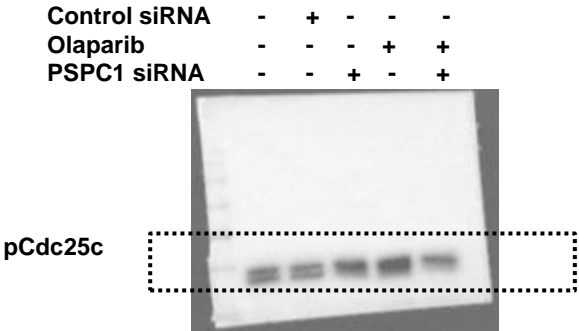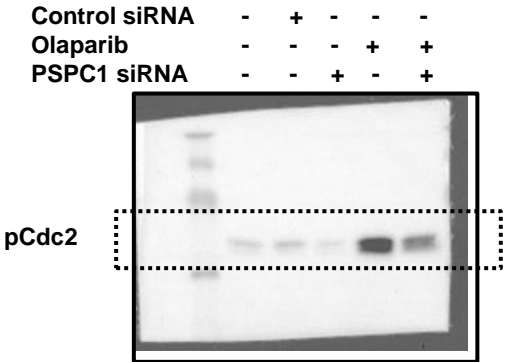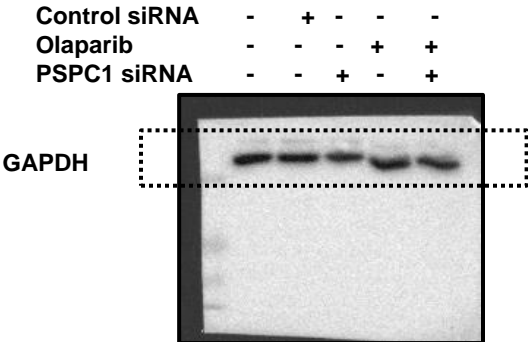

(D)

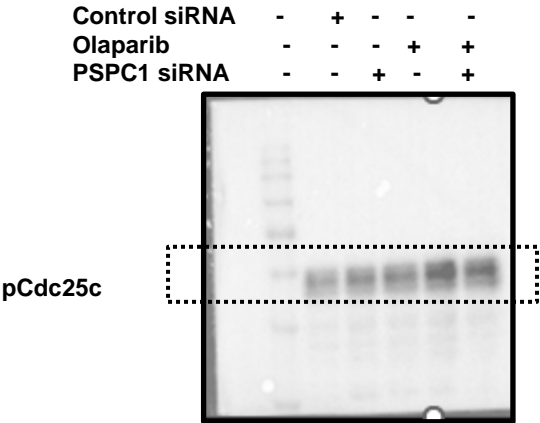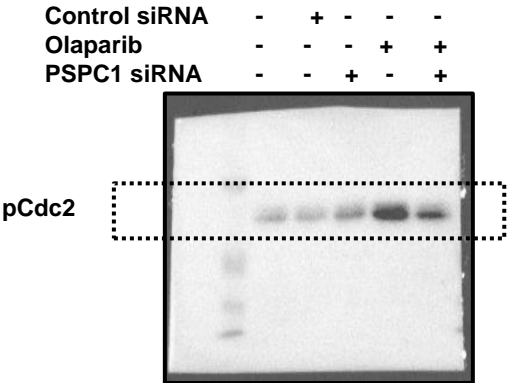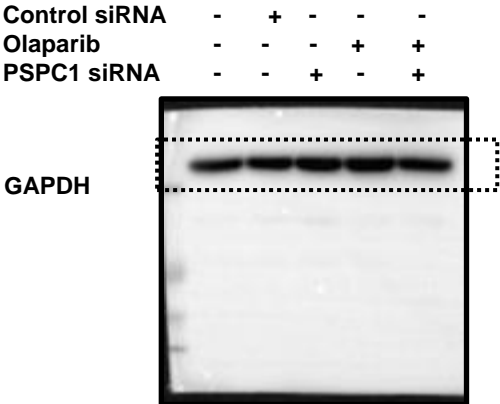

**Figure 4**

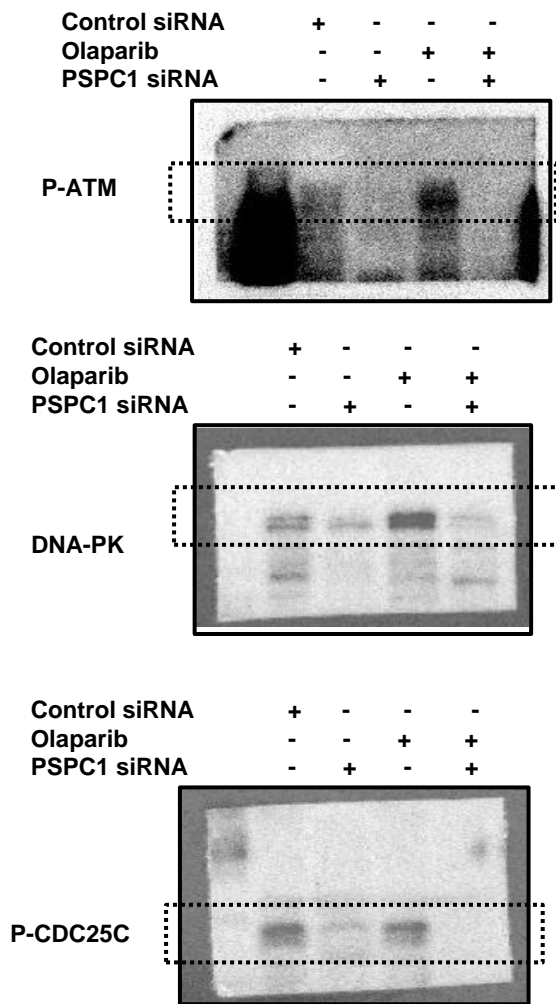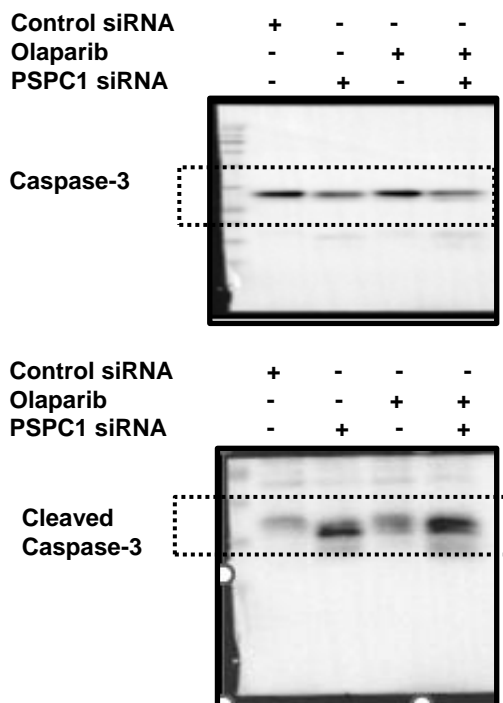

**(F)**

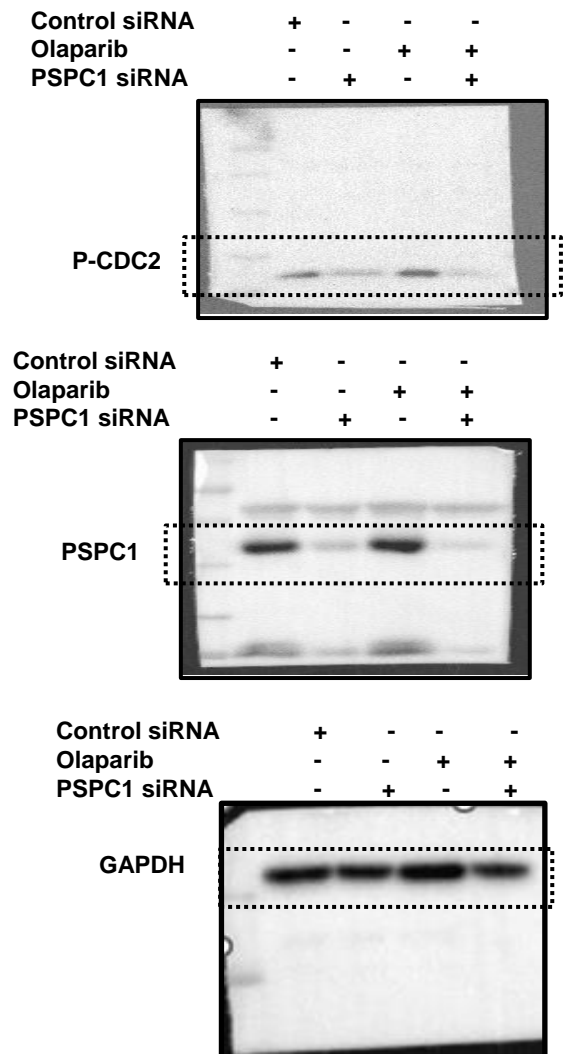

**(G)**

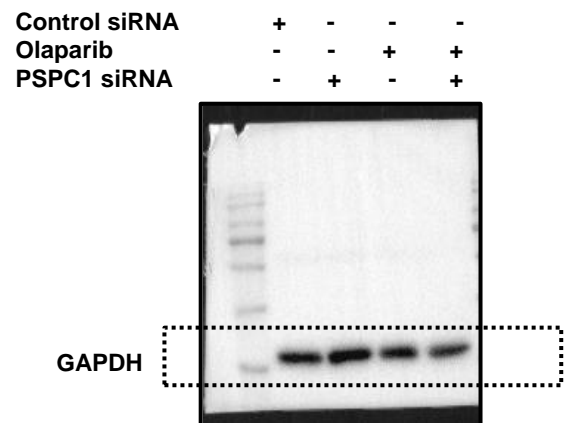

Supplement: s1 [file s1]
